# Supplementary material
Source: Springer Nature journal article supplement (https://www.springermedizin.de/resource/supplementary/13048_2013_189_MOESM1_ESM.pdf/9665090)
Supplement: MOESM1 [file 9665090]

Studies initially found  
(n = 44)

Studies excluded because of  
inclusion of frozen zygotes  
(n = 3)

Studies for more  
detailed evaluation  
(n = 41)

Studies excluded because of  
inclusion of azoospermic  
patients  
(n = 1)

Studies included in the  
systematic review  
(n = 40)
